# Supplementary material for: Metabolic Profiling of Glucose-Fed Metabolically Active Resting Zymomonas mobilis Strains
Source: MDPI journal article supplement (doi:10.3390/metabo10030081), 2020-02-26
Supplement: s1 [file s1]

Table S2. List of abbreviation of metabolites

| <a href="#">List of abbreviations of metabolites.</a> |                                                                |
|-------------------------------------------------------|----------------------------------------------------------------|
| G6P                                                   | Glucose 6-phosphate                                            |
| 6PGA                                                  | 6-phosphogluconate                                             |
| P5P                                                   | Ribulose 5-phosphate, Ribose 5-phosphate, Xylulose 5-phosphate |
| Sedo-7p                                               | Sedoheptulose 7-phosphate                                      |
| Gly-3p                                                | Glycerol 3-phosphate                                           |
| 3PG-2PG                                               | 2-Phosphoglycerate, 3-Phosphoglycerate                         |
| PEP                                                   | Phosphoenolpyruvate                                            |
| Pyr                                                   | Pyruvate                                                       |
| Suc                                                   | Succinate                                                      |
| Mal                                                   | Malate                                                         |
| AMP                                                   | Adenosine monophosphate                                        |
| ADP                                                   | Adenosine diphosphate                                          |
| ATP                                                   | Adenosine triphosphate                                         |
| GDP                                                   | Guanosine diphosphate                                          |
| GTP                                                   | Guanosine triphosphate                                         |
| CMP                                                   | Cytidine monophosphate                                         |
| CDP                                                   | Cytidine diphosphate                                           |
| CTP                                                   | Cytidine triphosphate                                          |
| UMP                                                   | Uridine monophosphate                                          |
| UDP                                                   | Uridine diphosphate                                            |
| UTP                                                   | Uridine triphosphate                                           |
| dAMP                                                  | Deoxy-adenosine monophosphate                                  |
| dADP                                                  | Deoxy-adenosine diphosphate                                    |
| dATP                                                  | Deoxy-adenosine triphosphate                                   |
| dGDP                                                  | Deoxy-guanosine diphosphate                                    |
| dGTP                                                  | Deoxy-guanosine triphosphate                                   |
| dUMP                                                  | Deoxy-uridine monophosphate                                    |
| dUTP                                                  | Deoxy-uridine triphosphate                                     |
| dCTP                                                  | Deoxy-cytidine triphosphate                                    |
| Gly                                                   | Glycine                                                        |
| Ala                                                   | Alanine                                                        |
| Ser                                                   | Serine                                                         |
| Pro                                                   | Proline                                                        |
| Val                                                   | Valine                                                         |
| Thr                                                   | Threonine                                                      |
| Ile                                                   | Isoleucine                                                     |
| Leu                                                   | Leucine                                                        |
| Asp                                                   | Aspartic acid                                                  |
| Gln                                                   | Glutamine                                                      |
| Glu                                                   | Glutamic acid                                                  |
| His                                                   | Histidine                                                      |
| Phe                                                   | Phenylalanine                                                  |
| Arg                                                   | Arginine                                                       |
| Lys                                                   | Lysine                                                         |
