# Supplementary material for: Metabolic Profiling of Glucose-Fed Metabolically Active Resting Zymomonas mobilis Strains
Source: MDPI journal article supplement (doi:10.3390/metabo10030081), 2020-02-26
Supplement: s1 [file s1]

Table S1

|                            | Metabolites | resting |                |                 |           |                |                 | growing |
|----------------------------|-------------|---------|----------------|-----------------|-----------|----------------|-----------------|---------|
|                            |             | aerobic |                |                 | anaerobic |                |                 | aerobic |
|                            |             | Zm6     | Zm6 <i>cat</i> | Zm6 <i>adhB</i> | Zm6       | Zm6 <i>cat</i> | Zm6 <i>adhB</i> | Zm6     |
| central carbon metabolites | G6P         | 498.0   | 111.7          | 247.7           | 119.8     | 193.3          | 198.9           | 1281.4  |
|                            | 6PGA        | 497.7   | 1141.2         | 1121.2          | 138.3     | 940.8          | 647.9           | 1120.5  |
|                            | P5P         | 144.5   | 429.7          | 277.9           | 135.6     | 510.00         | 534.1           | 177.1   |
|                            | Sedo-7p     | 185.2   | 768.7          | 278.1           | 156.8     | 274.6          | 161.9           | 166.2   |
|                            | Glycerol 3p | 110.2   | 217.00         | 176.2           | 86.4      | 311.5          | 337.1           | 210.4   |
|                            | 3PG-2PG     | 773.4   | 377.2          | 251.00          | 199.4     | 367.3          | 374.1           | 575.7   |
|                            | PEP         | 73.8    | 18.7           | 17.4            | 11.9      | 13.9           | 18.0            | 45.7    |
|                            | Pyr         | 2037.5  | 442.6          | 586.9           | 912.7     | 522.5          | 691.2           | 1888.0  |
|                            | Suc         | 49.7    | 59.7           | 75.2            | 53.9      | 155.0          | 85.1            | 327.8   |
|                            | Malate      | 1.7     | 3.2            | 0.8             | 2.0       | 8.5            | 1.9             | 21.0    |
| nucleotides                | AMP         | 860.6   | 1350.5         | 938.8           | 866.1     | 813.5          | 571.1           | 990.3   |
|                            | ADP         | 1875.0  | 2477.2         | 2111.1          | 1510.1    | 1847.9         | 1533.2          | 2706.5  |
|                            | ATP         | 3633.7  | 3731.0         | 5318.3          | 2184.0    | 3149.9         | 3536.7          | 6033.9  |
|                            | GDP         | 455.4   | 621.0          | 525.2           | 547.8     | 671.1          | 542.8           | 1049.8  |
|                            | GTP         | 1771.5  | 2048.5         | 2091.8          | 1627.7    | 2352.7         | 2186.2          | 5165.4  |
|                            | CMP         | 1332.6  | 1179.8         | 1130.6          | 435.5     | 1344.0         | 357.8           | 634.1   |
|                            | CDP         | 918.1   | 1057.9         | 678.8           | 459.8     | 683.2          | 304.5           | 872.6   |
|                            | CTP         | 1192.7  | 1913.2         | 1850.3          | 536.4     | 1168.4         | 986.2           | 2239.6  |
|                            | UMP         | 2664.5  | 2836.9         | 2753.5          | 3078.4    | 4102.8         | 2642.4          | 3457.4  |
|                            | UDP         | 577.9   | 667.3          | 547.1           | 636.1     | 692.4          | 460.2           | 416.8   |
| deoxy nucleotides          | dAMP        | 1.5     | 2.7            | 0.8             | 1.9       | 2.8            | 0.9             | 3.1     |
|                            | dADP        | 7.5     | 11.6           | 3.3             | 8.5       | 20.5           | 3.5             | 18.4    |
|                            | dATP        | 14.0    | 13.0           | 7.4             | 11.7      | 30.2           | 7.3             | 37.6    |
|                            | dGDP        | 22.3    | 20.9           | 44.4            | 18.9      | 5.2            | 13.5            | 50.0    |
|                            | dGTP        | 32.7    | 29.4           | 40.2            | 17.3      | 49.0           | 12.0            | 143.7   |
|                            | dUMP        | 0.3     | 0.7            | 0.7             | 0.4       | 0.4            | 0.5             | 0.9     |
|                            | dUTP        | 0.9     | 1.6            | 2.1             | 1.4       | 1.6            | 1.5             | 2.4     |
|                            | dCTP        | 12.5    | 15.7           | 16.5            | 7.3       | 11.5           | 7.7             | 12.8    |
| amino acids                | Glycine     | 423.7   | 391.2          | 267.9           | 403.7     | 682.1          | 290.3           | 1655.1  |
|                            | Alanine     | 720.9   | 1032.2         | 1322.9          | 696.9     | 888.0          | 656.8           | 4833.0  |
|                            | Ser         | 267.8   | 319.2          | 267.9           | 119.9     | 203.3          | 193.5           | 1875.3  |
|                            | Pro         | 166.6   | 247.1          | 527.5           | 171.9     | 396.4          | 407.5           | 579.0   |
|                            | Val         | 94.6    | 103.00         | 114.4           | 138.6     | 167.3          | 119.1           | 2775.2  |
|                            | Thr         | 44.0    | 61.8           | 55.8            | 41.3      | 61.8           | 48.4            | 1762.0  |
|                            | Ile         | 38.6    | 38.6           | 50.2            | 56.0      | 56.6           | 54.0            | 1151.6  |
|                            | Leu         | 147.9   | 144.1          | 192.6           | 242.5     | 260.0          | 238.2           | 1969.7  |
|                            | Asp         | 135.9   | 298.6          | 513.5           | 303.8     | 540.5          | 586.1           | 1145.3  |
|                            | Gln         | 36.0    | 113.3          | 83.7            | 21.3      | 92.7           | 40.9            | 7344.0  |
|                            | Glu         | 1660.3  | 1989.7         | 1535.0          | 1112.6    | 1822.4         | 1027.1          | 7482.4  |
|                            | His         | 48.0    | 54.1           | 41.9            | 45.3      | 56.6           | 50.2            | 264.3   |
|                            | Phe         | 99.9    | 46.3           | 41.9            | 135.9     | 77.2           | 42.8            | 918.8   |

|  |               |        |        |        |        |        |        |        |
|--|---------------|--------|--------|--------|--------|--------|--------|--------|
|  | Arg           | 4787.7 | 3547.0 | 2218.8 | 1349.8 | 2211.1 | 1313.6 | 2139.6 |
|  | Lys           | 3239.3 | 2440.2 | 1258.7 | 1285.9 | 1876.4 | 852.2  | 2089.3 |
|  | Energy charge | 0.72   | 0.66   | 0.76   | 0.64   | 0.70   | 0.76   | 0.76   |
